# Supplementary material for: Ruxolitinib-Loaded Imprinted Polymeric Drug Reservoir for the Local Management of Post-Surgical Residual Glioblastoma Cells
Source: MDPI journal article supplement (doi:10.3390/polym15040965), 2023-02-15
Supplement: s1 [file s1]

## Supplementary Material

### Ruxolitinib-loaded imprinted polymeric drug reservoir for the local management of post-surgical residual glioblastoma cells

Alexandra-Iulia Băraian, Bogdan Cezar Iacob, Olga Sorițău, Ioan Tomuță, Lucia Ruxandra Tefas, Lucian Barbu- Tudoran, Sergiu Șuşman and Ede Bodoki

#### S1. Spectrofluorimetric detection and quantification of RUX

Detection and quantification of RUX were initially performed by spectrofluorimetry, using an Avantes system with AvaLight-XE pulsed xenon light source and AvaSpec-ULS2048CL-EVO spectrometer. Detection was done in a low-volume quartz cuvette (100  $\mu$ L). Excitation wavelength  $\lambda_{\text{ex}} = 320$  nm and emission wavelength  $\lambda_{\text{em}} = 386$  nm. Data collection was done using integrated AvaSoft software.

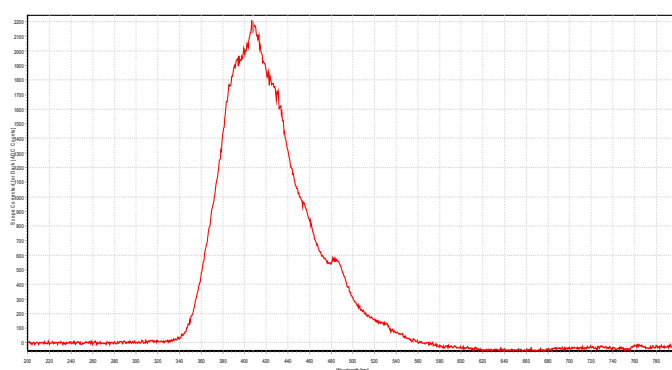

Figure S1 Fluorescence spectrum of RUX

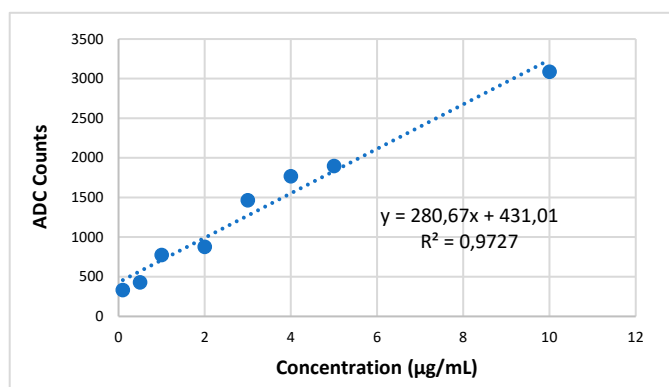

Figure S2. Spectrofluorimetry calibration curve

## S2. HPLC detection and quantification of RUX

**Table S1** Chromatographic data of the calibration set of standard RUX for regression analysis

| C (µg/mL) RUX | Peak area |          |          | Average area | SD    |
|---------------|-----------|----------|----------|--------------|-------|
|               | Series 1  | Series 2 | Series 3 |              |       |
| 0.1           | 3.844     | 3.869    | 3.617    | 3.78         | 0.139 |
| 1             | 38.1      | 38.9     | 38.5     | 38.50        | 0.566 |
| 5             | 181       | 181.3    | 180.35   | 180.88       | 0.486 |
| 10            | 358.4     | 359.9    | 361.1    | 359.80       | 1.353 |
| 50            | 1594.7    | 1597.7   | 1600.9   | 1597.77      | 3.101 |
| 75            | 2361      | 2365.3   | 2364.4   | 2363.57      | 2.268 |

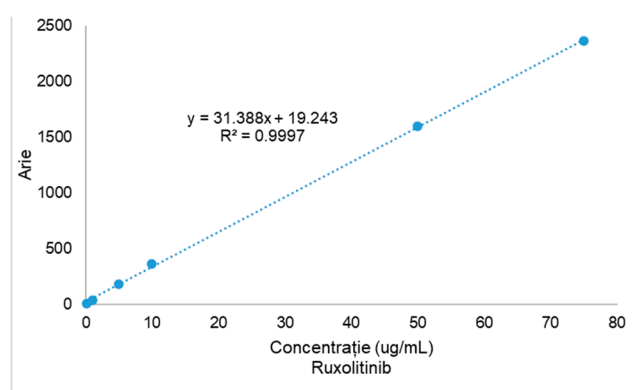

**Figure S3.** Linear regression of RUX using HPLC analysis

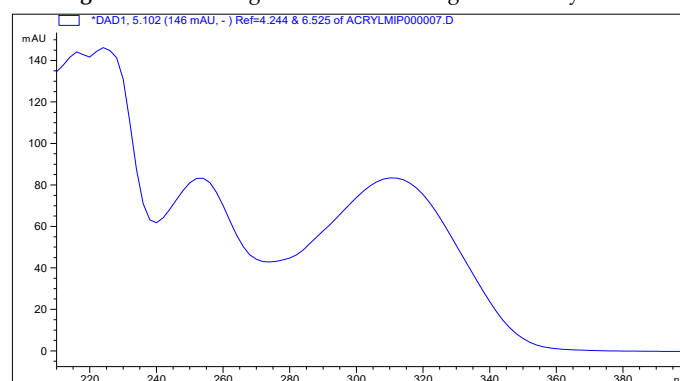

**Figure S4.** UV spectrum of RUX

## S3. Calculations of loading capacity and rebinding capacity

RUX's concentration in the supernatant corresponds to the unloaded drug, so the quantity of MIP-loaded RUX was calculated as follows:

$$LC = \frac{m_{\text{loaded}} \times 1000}{m_{\text{MIP}}}$$

$$m_{\text{loaded}} = m_0 - m_{\text{sup}}$$

$$m_0 = V_0 \times M_M \times C_M \times 1000$$

$$m_{\text{sup}} = \frac{c_{\text{sup}} \times V_{\text{sup}}}{1000}$$

where



LC = loading capacity (mg RUX/g MIP),  $m_{\text{loaded}}$  = mass of loaded RUX (mg),  $m_{\text{MIP}}$  = mass of final MIP product (mg),  $m_0$  = mass of total RUX from initial solution (mg),  $m_{\text{sup}}$  = mass of RUX in the supernatant solution (mg),  $V_0$  = volume of initial solution prior to polymerization (L),  $M_M$  = molar mass of RUX (g/mole),  $C_M$  = RUX concentration in the initial solution (mole/L),  $C_{\text{sup}}$  = RUX concentration in the supernatant solution after polymerization ( $\mu\text{g/mL}$ ),  $V_{\text{sup}}$  = volume of supernatant after polymerization (mL)

The amount of rebound RUX was calculated as follows:

$$RC = \frac{m_{\text{rebound}} \times 1000}{m_{\text{NIP}}}$$

$$m_{\text{rebound}} = m_0 - m_{\text{sup}}$$

$$m_0 = V_0 \times M_M \times C_M$$

$$m_{\text{sup}} = \frac{c_{\text{sup}} \times V_0}{1000}$$

where

RC = rebinding capacity (mg RUX/g NIP),  $m_{\text{rebound}}$  = mass of rebound RUX (mg),  $m_{\text{NIP}}$  = mass of initial amount of weighted NIP powder (mg),  $m_0$  = total amount of RUX in the initial solution (mg),  $m_{\text{sup}}$  = amount of RUX in the supernatant solution after separation (mg),  $V_0$  = volume (L) of initial RUX stock solution added, according to the amount of NIP for 10mg/mL,  $M_M$  = molar mass of RUX (g/mole),  $C_M$  = RUX concentration in the initial stock solution (mole/L),  $C_{\text{sup}}$  = RUX concentration in the supernatant solution after binding ( $\mu\text{g/mL}$ )

#### S4. Real-time drug diffusion tests with spectrofluorimetric detection

The drug release profile of RUX from MIPs was initially evaluated by real-time experiments using the same Franz cell-based system, coupled with spectrofluorimetric detection. The sampling process was automated by using a peristaltic pump (IsmaTec, IPC) which continuously took samples from the Franz cell and transferred them to the detection cell. Release medium consisted of PBS supplemented with 2% (m/V) sodium dodecyl sulfate. The donor compartment was loaded with 300  $\mu\text{L}$  fibrin hydrogel made by suspending MIPs (5.35 mg MIP2, 3.63 mg MIP4) in a fibrinogen solution (20 mg/mL) and adding thrombin. Cumulative drug release (Figure S4.2) was assessed by spectrofluorimetry, based on the method described in S1.

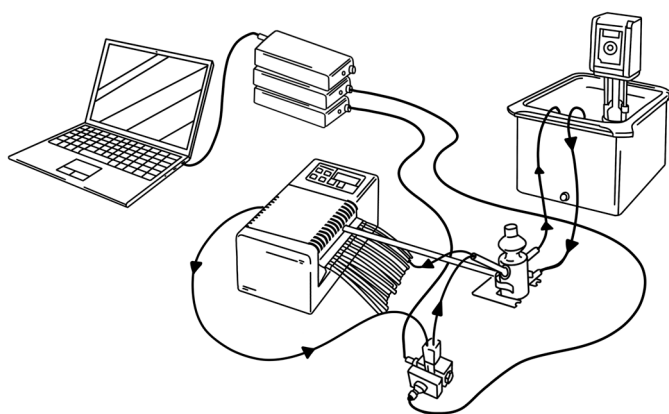

Figure S5. Illustration of the semi-automated custom-made system for diffusion tests

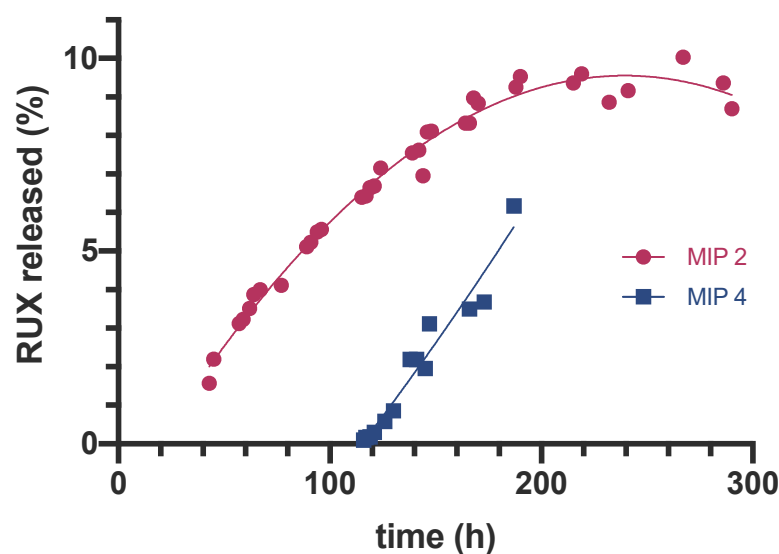

Figure S6. Release profile of RUX from MIP 2 and MIP 4 in Franz cells

## S5. Accelerated drug release studies with HPLC-UV detection

Results are presented as cumulative drug release percentages, based on the following formulas:

*For each time interval  $t_i$  where  $i = 1 \rightarrow 9$*

$$q_i = C_i \times V_s$$

$$Q_i = C_i \times V_0 + \sum_{i=1}^{i=9} q_{i-1}$$

$$P_i = \frac{Q_i}{Q_0} \times 100$$

*while*

$$V_0 = \frac{m_{MIP}}{2}$$

$$Q_0 = m_{MIP} \times LC$$

*where*

$t$  = time (hours),  $i$  = ,  $q_i$  = quantity of RUX ( $\mu\text{g}$ ) in samples at each time interval,  $C_i$  = RUX concentration in sample ( $\mu\text{g/mL}$ ) at each time interval,  $V_s$  = volume of the sample (mL),  $Q_i$  = cumulative quantity of RUX ( $\mu\text{g}$ ) at each time interval,  $V_0$  = total volume of release medium (mL) as a function of MIP amount for 2mg/mL suspensions,  $P_i$  = percentage of RUX (%) released at each time interval,  $Q_0$  = total amount of RUX found in the amount of weighted MIPs ( $\mu\text{g}$ ),  $m_{MIP}$  = total amount of MIP weighted (mg),  $LC$  = loading capacity ( $\mu\text{g RUX/mg MIP}$  or mg RUX/g MIP).

**Table S2.** Drug release at pH = 7.4

| Time (h) | RUX released (%) $\pm$ SD |                     |                     |                    |
|----------|---------------------------|---------------------|---------------------|--------------------|
|          | MIP 1                     | MIP 2               | MIP 3               | MIP4               |
| 1        | 18.020 $\pm$ 4.480        | 25.860 $\pm$ 7.826  | 22.568 $\pm$ 8.644  | 4.558 $\pm$ 0.571  |
| 2        | 21.503 $\pm$ 4.864        | 33.439 $\pm$ 10.462 | 24.940 $\pm$ 9.091  | 9.691 $\pm$ 0.870  |
| 3        | 22.953 $\pm$ 5.295        | 35.785 $\pm$ 9.664  | 26.501 $\pm$ 9.784  | 13.016 $\pm$ 0.983 |
| 6        | 24.510 $\pm$ 6.117        | 37.954 $\pm$ 9.411  | 27.727 $\pm$ 10.657 | 15.662 $\pm$ 1.114 |
| 12       | 25.576 $\pm$ 6.428        | 38.999 $\pm$ 9.439  | 28.656 $\pm$ 10.824 | 16.915 $\pm$ 0.861 |
| 24       | 26.292 $\pm$ 6.527        | 40.124 $\pm$ 9.549  | 29.383 $\pm$ 10.906 | 17.357 $\pm$ 1.178 |
| 48       | 26.877 $\pm$ 7.036        | 40.575 $\pm$ 9.734  | 29.996 $\pm$ 11.171 | 17.764 $\pm$ 1.065 |
| 72       | 27.737 $\pm$ 7.025        | 41.165 $\pm$ 9.570  | 30.984 $\pm$ 11.458 | 18.284 $\pm$ 1.129 |
| 96       | 28.232 $\pm$ 7.072        | 41.998 $\pm$ 9.703  | 31.501 $\pm$ 11.618 | 18.221 $\pm$ 1.338 |

**Table S3.** Drug release at pH = 5.5

| Time (h) | RUX released (%) $\pm$ SD |                    |                    |                    |
|----------|---------------------------|--------------------|--------------------|--------------------|
|          | MIP 1                     | MIP 2              | MIP 3              | MIP4               |
| 1        | 29.662 $\pm$ 6.920        | 17.191 $\pm$ 0.325 | 11.681 $\pm$ 0.488 | 12.040 $\pm$ 1.172 |
| 2        | 32.721 $\pm$ 9.997        | 17.839 $\pm$ 1.445 | 13.476 $\pm$ 0.368 | 20.073 $\pm$ 2.789 |
| 3        | 34.272 $\pm$ 10.341       | 19.311 $\pm$ 0.766 | 14.417 $\pm$ 0.521 | 23.472 $\pm$ 2.392 |
| 6        | 34.450 $\pm$ 10.245       | 20.069 $\pm$ 0.119 | 15.746 $\pm$ 0.472 | 25.988 $\pm$ 3.025 |
| 12       | 34.574 $\pm$ 10.411       | 20.309 $\pm$ 0.671 | 16.008 $\pm$ 0.697 | 26.930 $\pm$ 4.896 |
| 24       | 35.536 $\pm$ 9.864        | 20.893 $\pm$ 0.903 | 16.227 $\pm$ 0.604 | 28.504 $\pm$ 1.775 |
| 72       | 33.364 $\pm$ 9.392        | 19.124 $\pm$ 1.226 | 16.692 $\pm$ 0.510 | 26.337 $\pm$ 3.569 |

## S6. Phase contrast microscopy images

Phase contrast microscopy offers information about the number of cells, their morphology and viability. Thus, we recorded microscopy images of cell plates as part of the experiment in order to assess cell viability following exposure to RUX, MIPs and NIPs. Cytotoxicity can be observed by a decrease in cell number and their tendency to aggregate in small colonies (Figures S6.1, S6.2, S6.3).

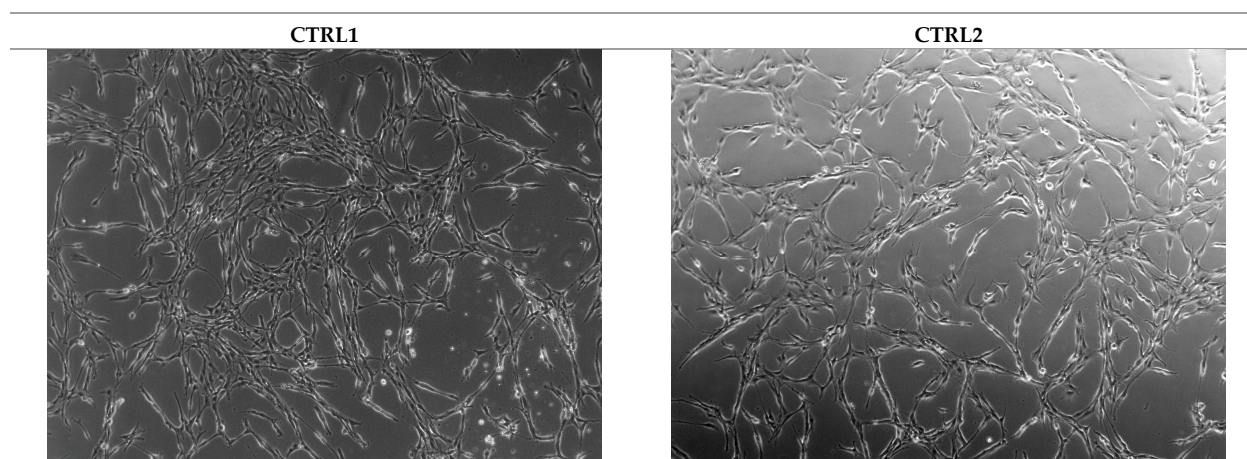

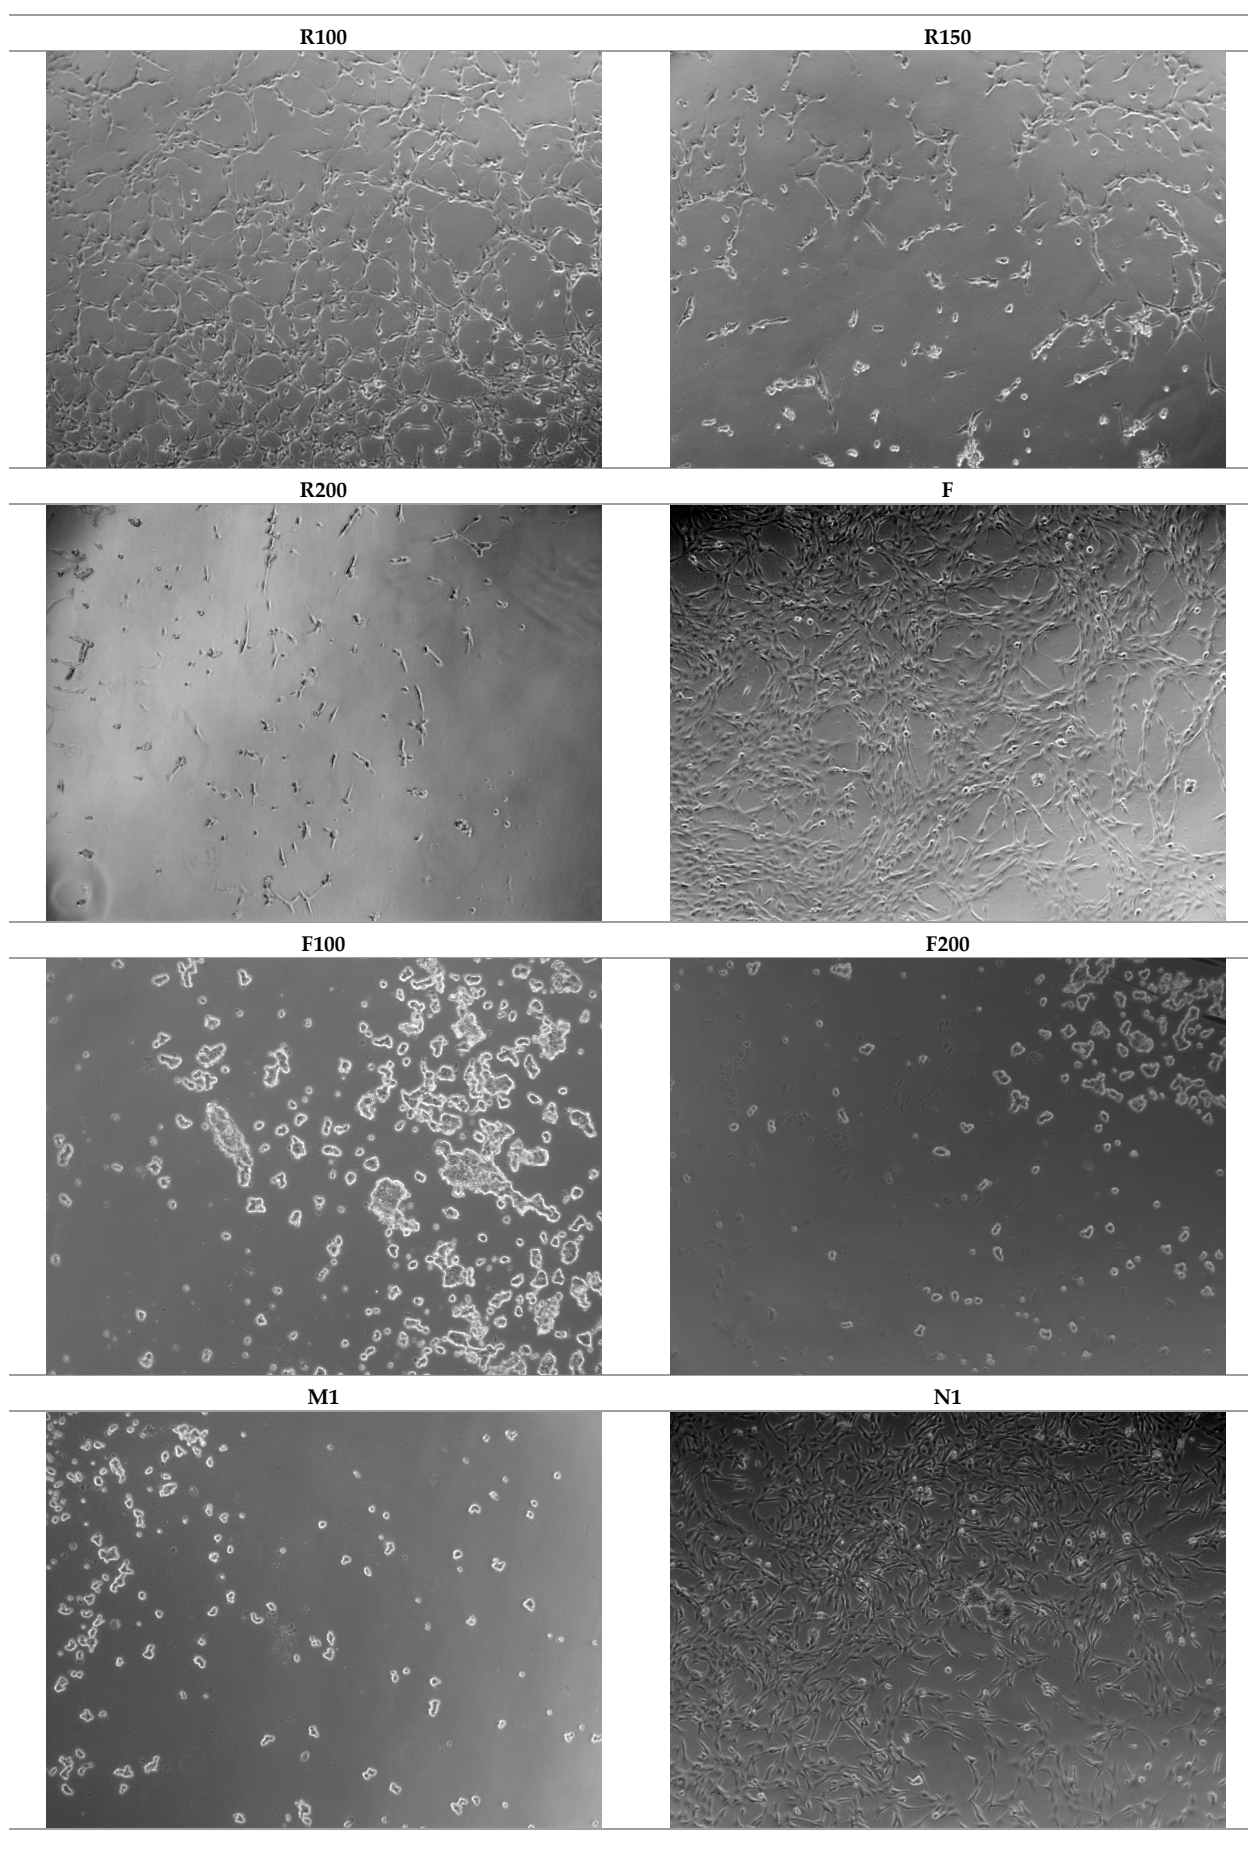



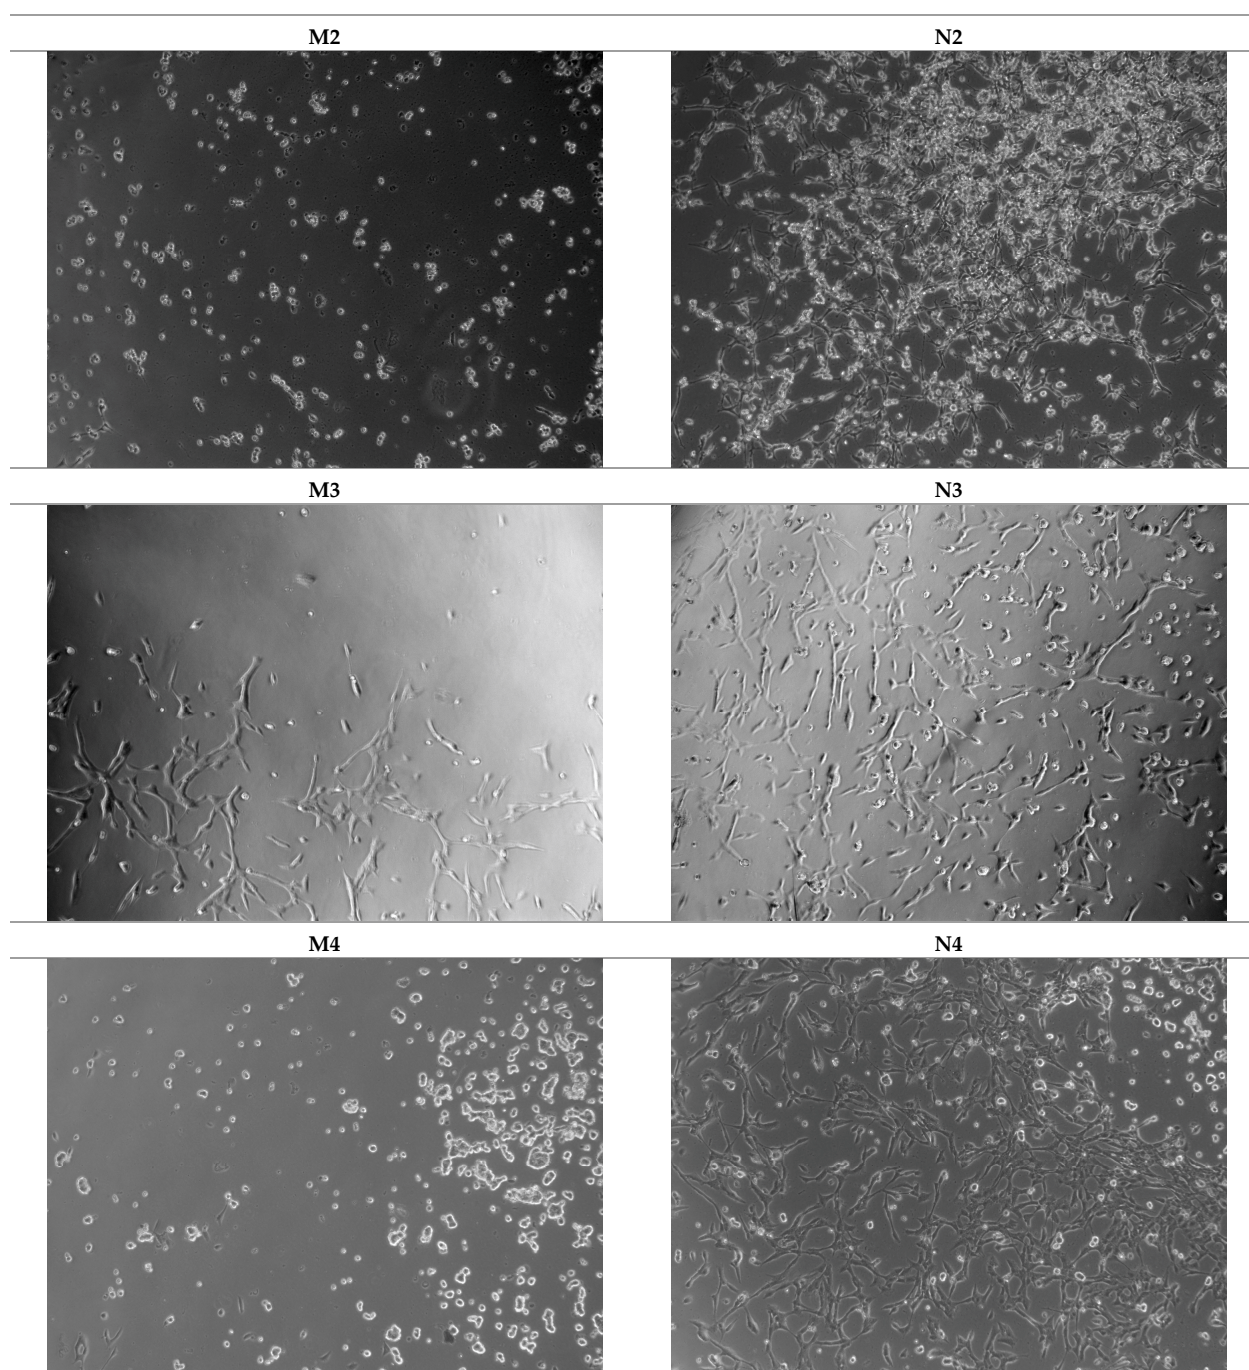

**Figure S7.** Phase contrast microscopy images taken at 24 hours with 10X objective



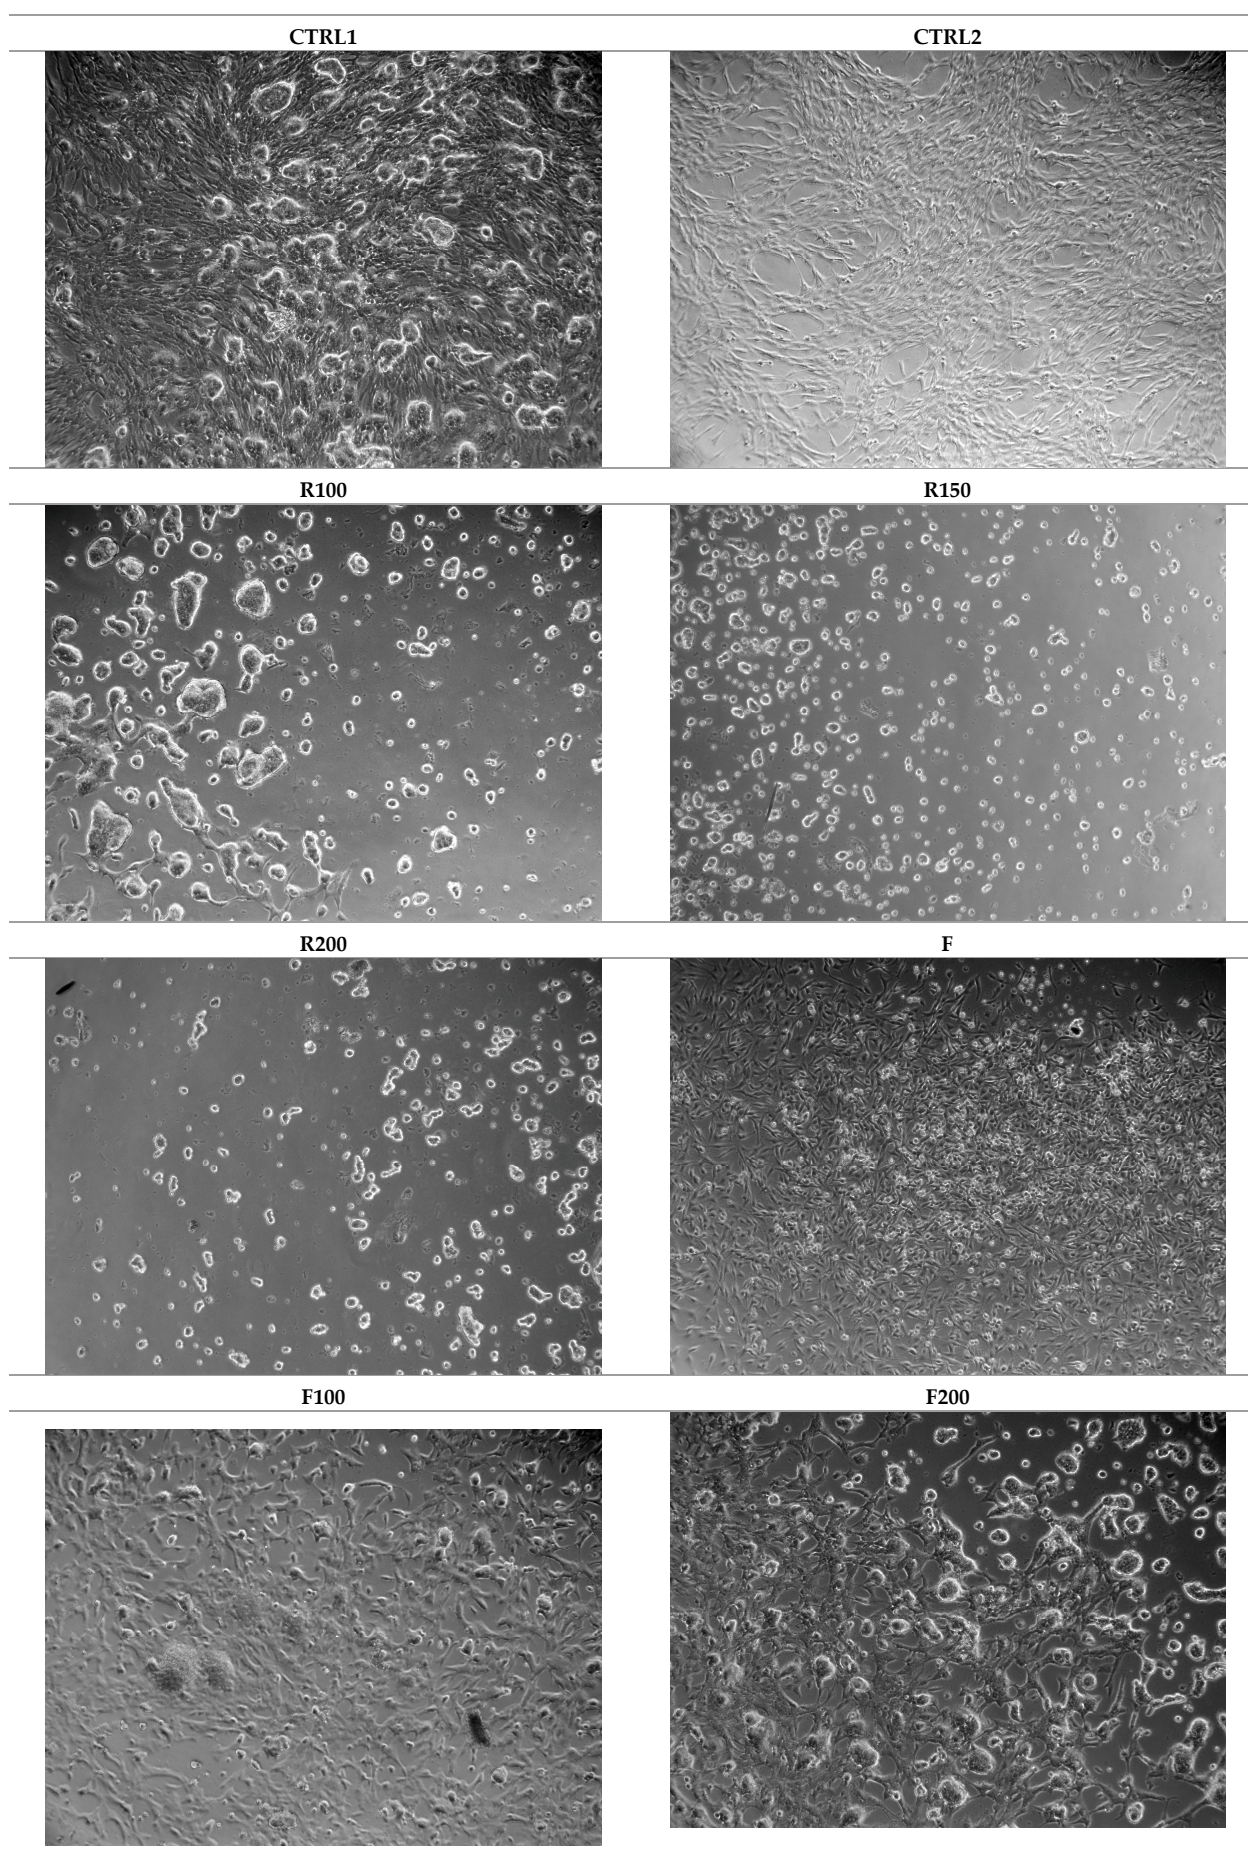



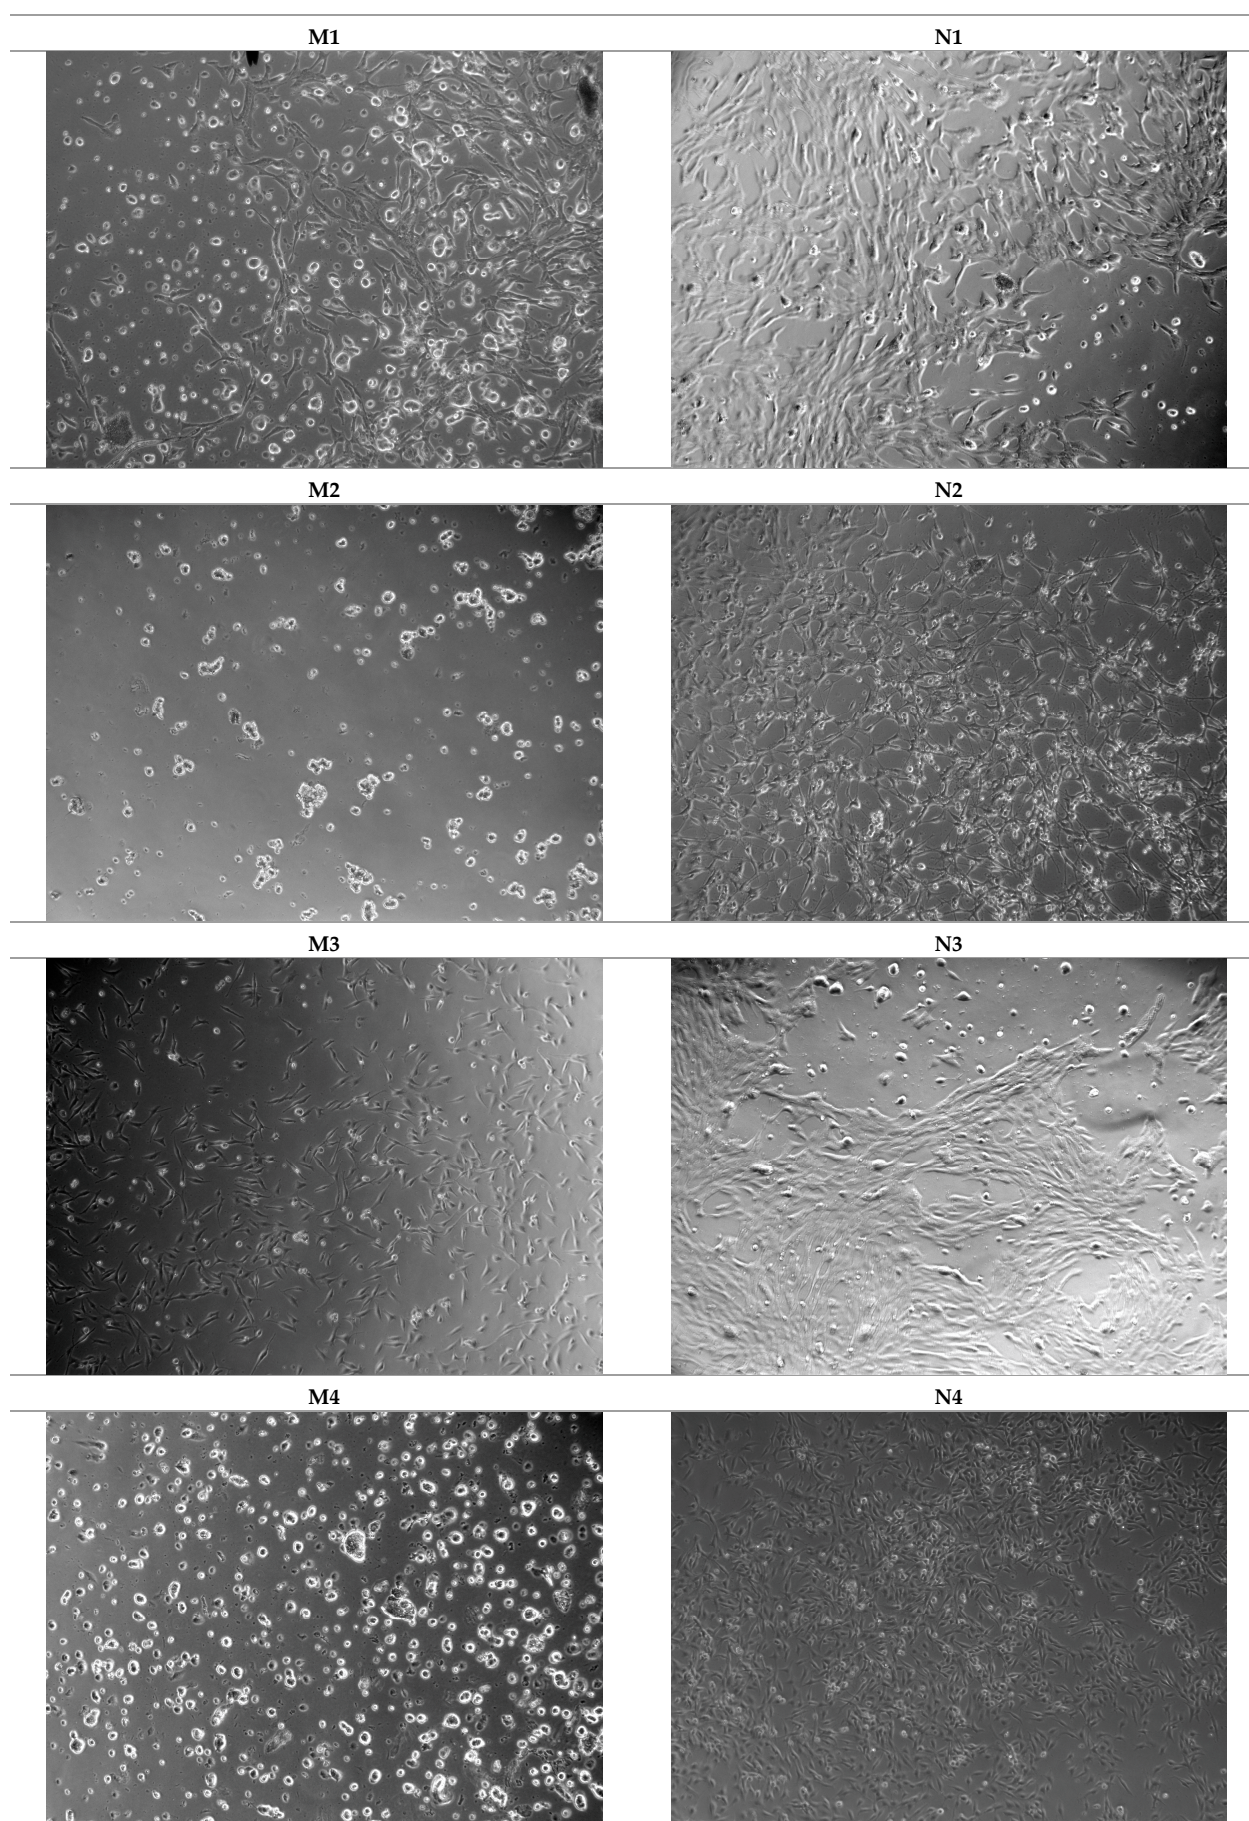

**Figure S8.** Phase contrast microscopy images taken at 48 hours with 10X objective



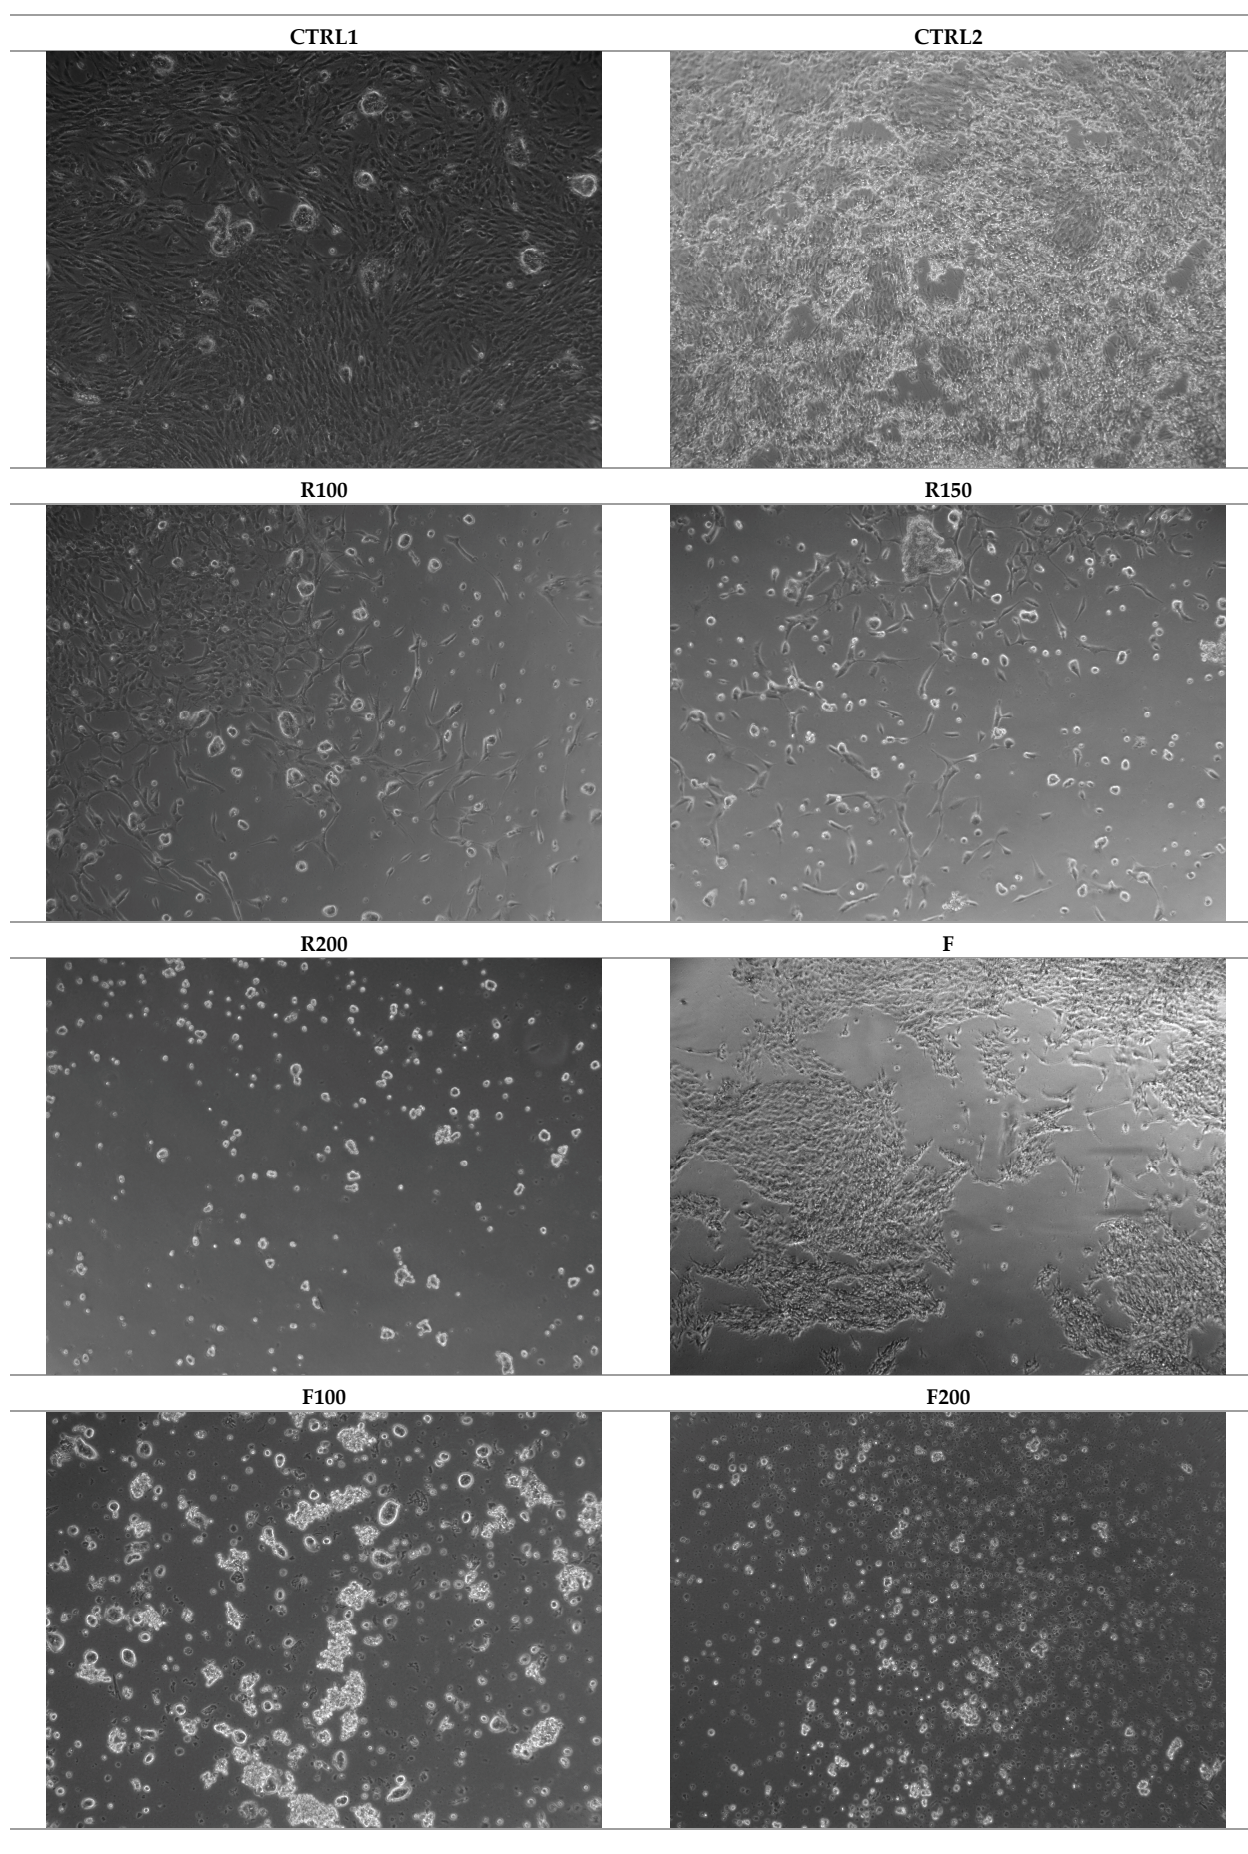



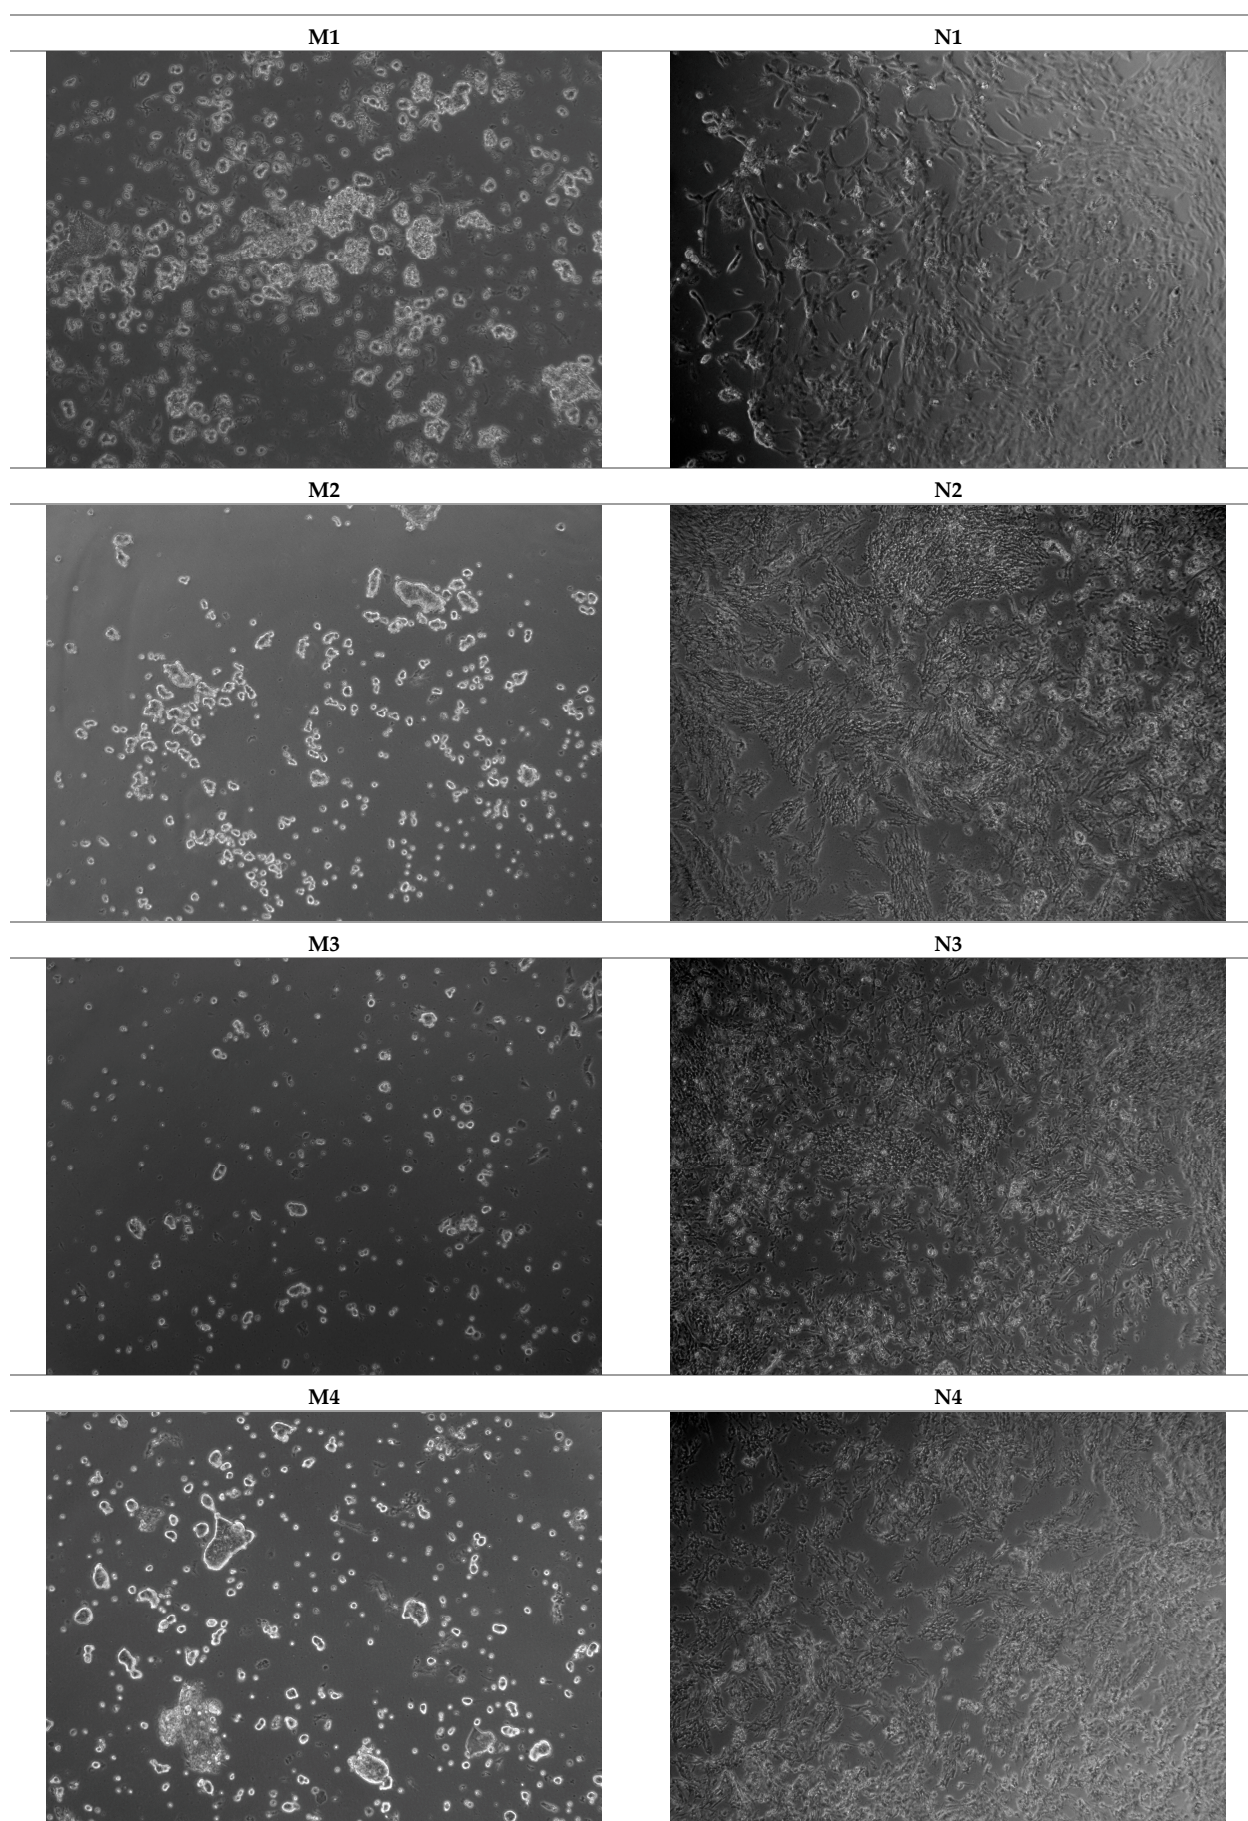

**Figure S9.** Phase contrast microscopy images taken at 96 hours with 10X objective
